# Supplementary material for: β-Catenin: A Metazoan Filter for Biological Noise?
Source: PubMed Central journal article supplement (PMC6805772; doi:10.3389/fgene.2019.01004), 2019-10-16
Supplement: DataSheet_1.pdf [file DataSheet_1.pdf]

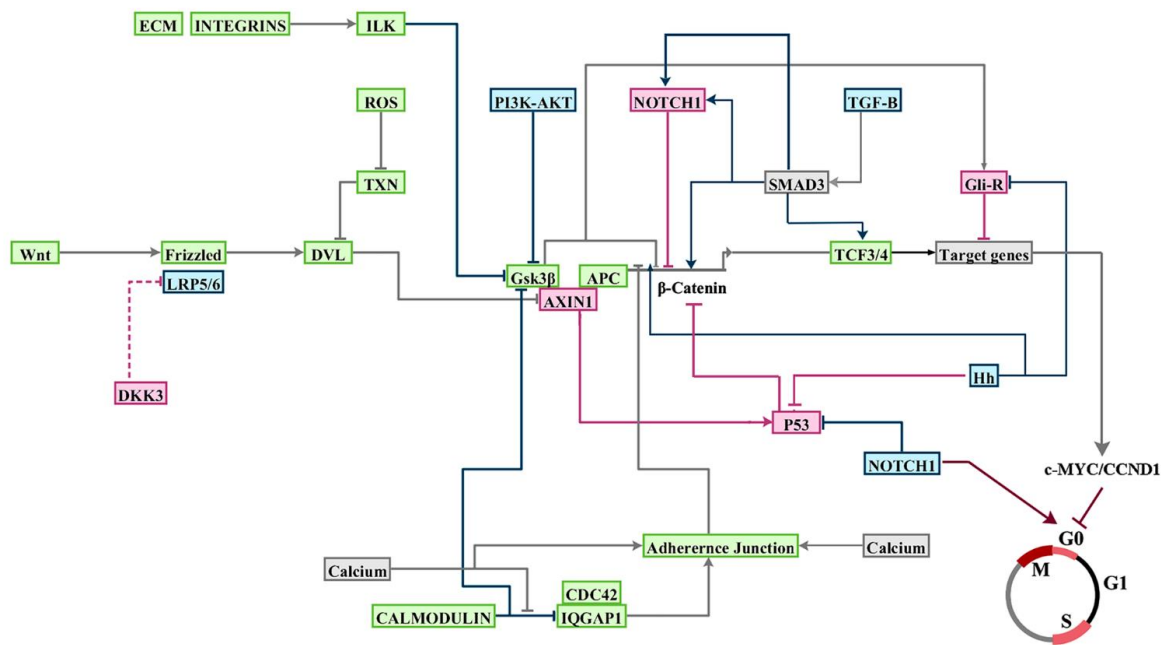

**Supplementary Figure 1.** Strategic wiring of  $\beta$ -catenin to other signaling cascades that boosts noise buffering capacity of the protein. Signaling by majority of pathways, e.g. sonic hedgehog (Hh), TGF- $\beta$ , PI3K-Akt, amplify the transcriptional activity of  $\beta$ -catenin (blue lines). On the contrary, stress-related pathways, e.g. notch-1, p53, and gsk3 $\beta$ , reduce the availability of free-cytoplasmic  $\beta$ -catenin (red lines). Wnt signaling is the main amplifier of noise buffering capacity of  $\beta$ -catenin (green lines).
